# Supplementary material for: A donor–acceptor liganded metal–organic framework showcases the hydrogen-bond-enhanced sensing of N-heterocyclic explosives
Source: Royal Society of Chemistry journal article supplement (doi:10.1039/d1tc03197j), 2021-01-01
Supplement: d1tc03197j1.pdf [file d1tc03197j1.pdf]

## Electronic Supplementary Information

### **Donor-acceptor liganded metal-organic framework showcases hydrogen-bonds enhanced sensing of N-heterocyclic explosives**

Junjie Wang, Yao Cheng, Jie Zhou, Weihua Tang\*

#### **Table of Contents**

|                                        |    |
|----------------------------------------|----|
| 1. Materials and characterization..... | 2  |
| 2. NMR and mass spectra.....           | 2  |
| 3. Morphology observation.....         | 4  |
| 4. FT-IR spectra and TGA analysis..... | 5  |
| 5. Single crystal XRD data.....        | 6  |
| 6. Structural modelling of MOF.....    | 7  |
| 7. Powder XRD and BET analysis.....    | 8  |
| 8. PL studies.....                     | 9  |
| 9. Modelling of explosives.....        | 10 |
| 10. Explosive detection with MOF.....  | 11 |

|                                                |    |
|------------------------------------------------|----|
| 11. Modelling for the detection mechanism..... | 14 |
|------------------------------------------------|----|

## 1. Materials and characterization

All reagents and chemicals were purchased through commercial channels. 2,7-Dibromo-9-fluorenone, 4-(4,4,5,5-tetramethyl-1,3,2-dioxaborolan-2-yl)pyridine, [1,1'-biphenyl]-4,4'-dicarboxylic acid, 4-nitrotoluene, toluene,  $\text{Zn}(\text{NO}_3)_2 \cdot 6\text{H}_2\text{O}$  were purchased from Shanghai Bidepharm Technology Co., Ltd. 3-Nitrophenol, 4-nitrophenol,  $\text{MgSO}_4$  and  $\text{K}_2\text{CO}_3$  were purchased from Shanghai Macklin Biochemical Co., Ltd. Ethyl alcohol, petroleum ether, ethyl acetate and dichloromethane were purchased from Shanghai Titan Technology Co., Ltd. N,N-dimethylformamide and  $\text{Pd}(\text{PPh}_3)_4$  were purchased from Energy-chemical (Shanghai, China). Acetonitrile, 1,4-dinitrobenzene, nitrobenzene was purchased from Shanghai Aladdin Biochemical Technology Co., Ltd. 2-Nitro-2-(1H-1,2,4-triazol-5-yl)ethene-1,1-diamine (TriazFOX) and 2-nitro-2-(2H-tetrazol-5-yl)-1,1-ethenediamine (TetrazFOX) were provided by Tang's group.

Powder X-ray diffraction (PXRD) measurements were recorded from Bruker D8 Advance Diffractometer with  $\text{Cu-K}\alpha$  radiation and the data were collected within the  $2\theta$  in range of 5-40°. The morphologies of materials were observed by a FEI400FEG scanning electron microscopy (SEM). High-resolution transmission electron microscopy (TEM) was carried out on JEOL JEM-2100F electron microscope. NMR spectra were measured at on AVANCE III 500 MHz Digital NMR Spectrometer. Fourier transform infrared (FTIR) spectrometer (Nicolet IS-10, USA) is used to measure the transmittance spectra in the range of 4000–500  $\text{cm}^{-1}$ . UV-visible absorption spectra were measured on an EV 200 instrument. Thermal analysis was performed using TGA/SDTA851E (Mettler Toledo) with a heating rate of 20°C  $\text{min}^{-1}$  in  $\text{N}_2$  atmosphere.  $\text{N}_2$  gas adsorption measurements on ZnMOF-1 were performed using Micromeritics 3-Flex. Fluorescence spectra were recorded on RF-6000 Spectro Fluorimeter.

## 2. NMR and mass spectra

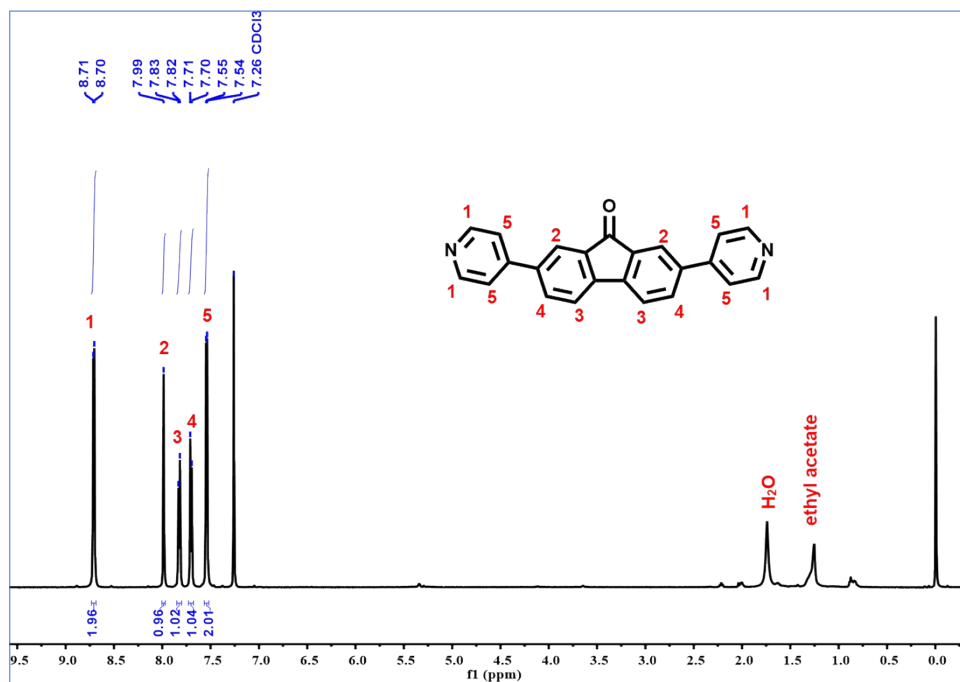

Figure S1. 500 MHz <sup>1</sup>H NMR spectrum of DPyF.

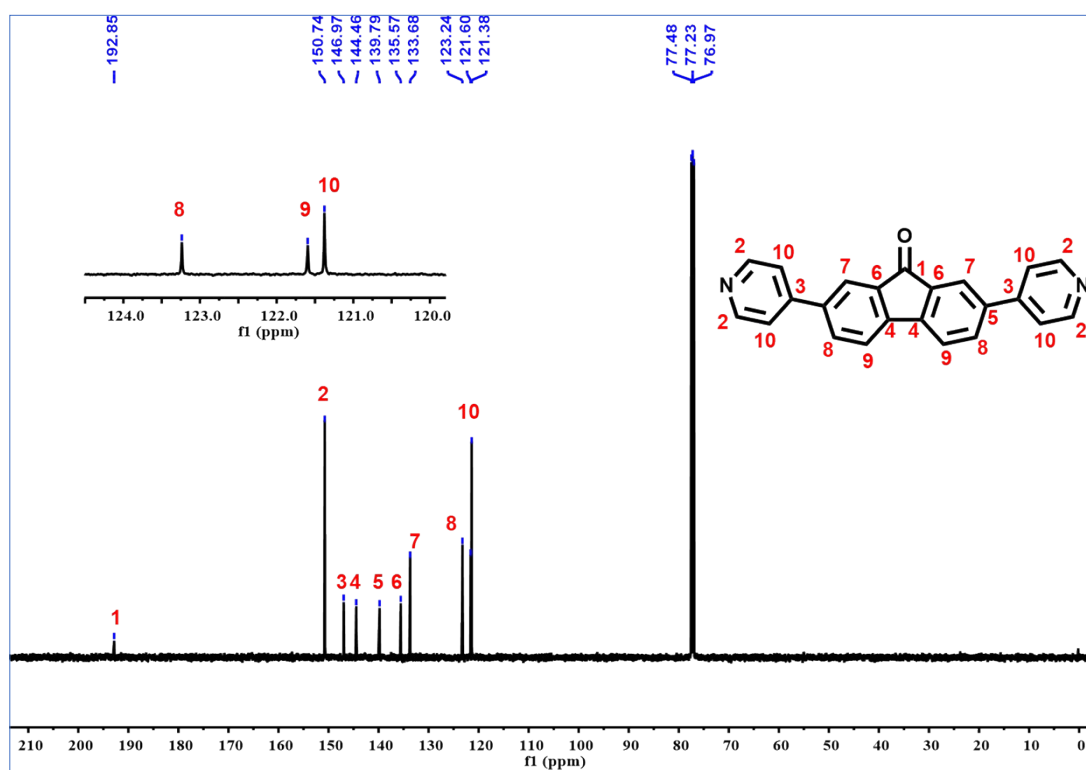

Figure S2. 500 MHz <sup>13</sup>C NMR spectrum of DPyF.

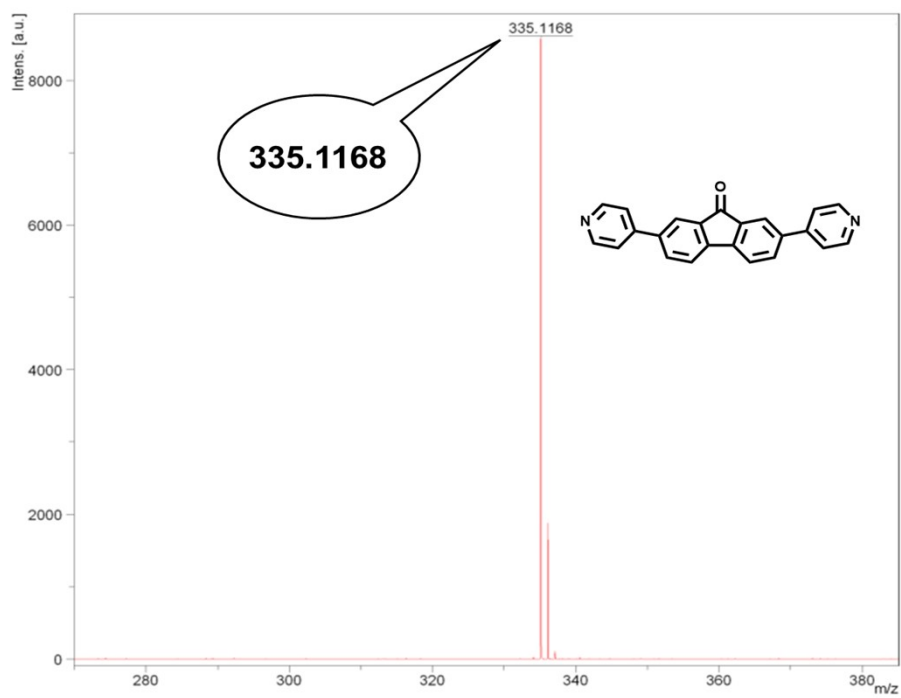

**Figure S3.** Mass Spectrum of DPyF.

### 3. Morphology observation

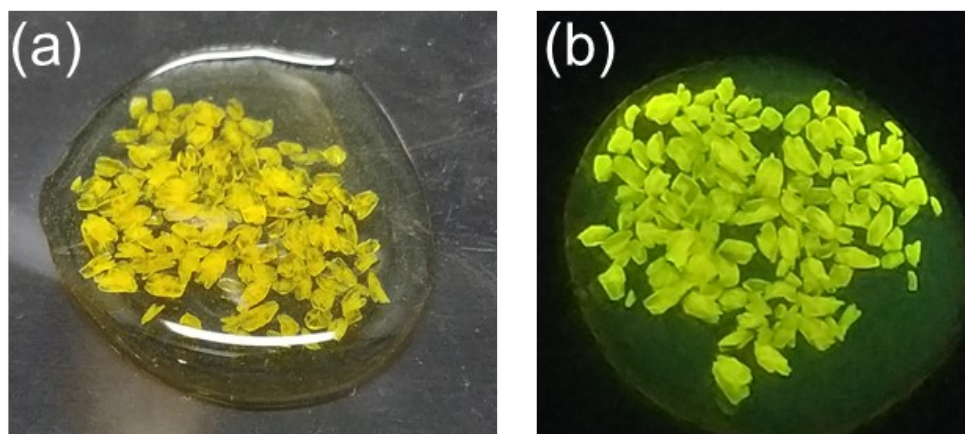

**Figure S4.** The crystals structural of ZnMOF-1 at daylight (a) and 365 nm UV light (b).

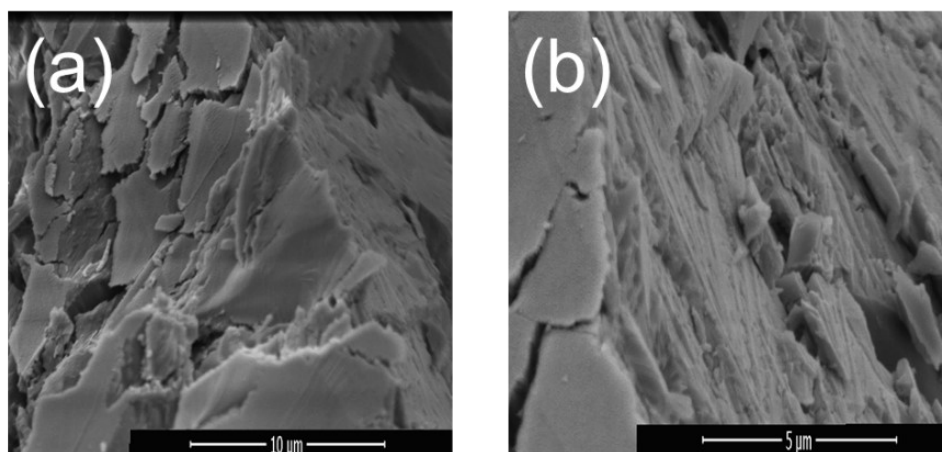

**Figure S5.** SEM image of ZnMOF-1

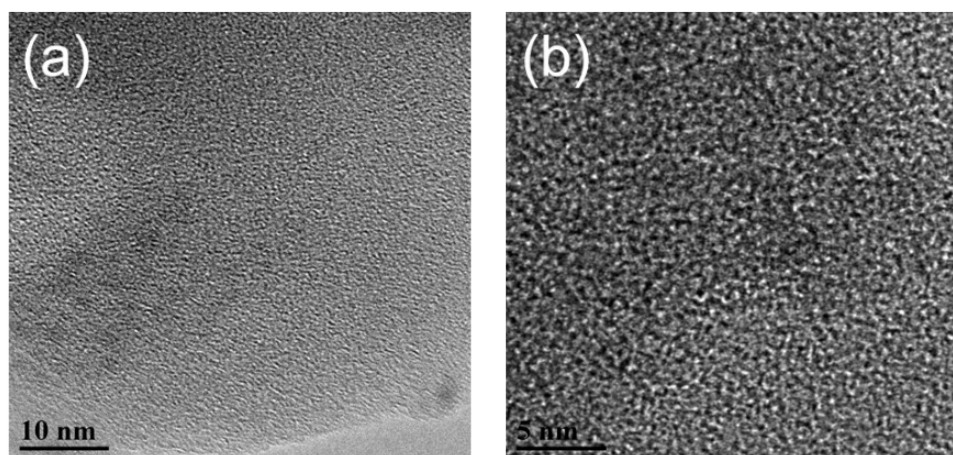

**Figure S6.** HRTEM image of ZnMOF-1.

#### 4. FT-IR spectra and TGA analysis

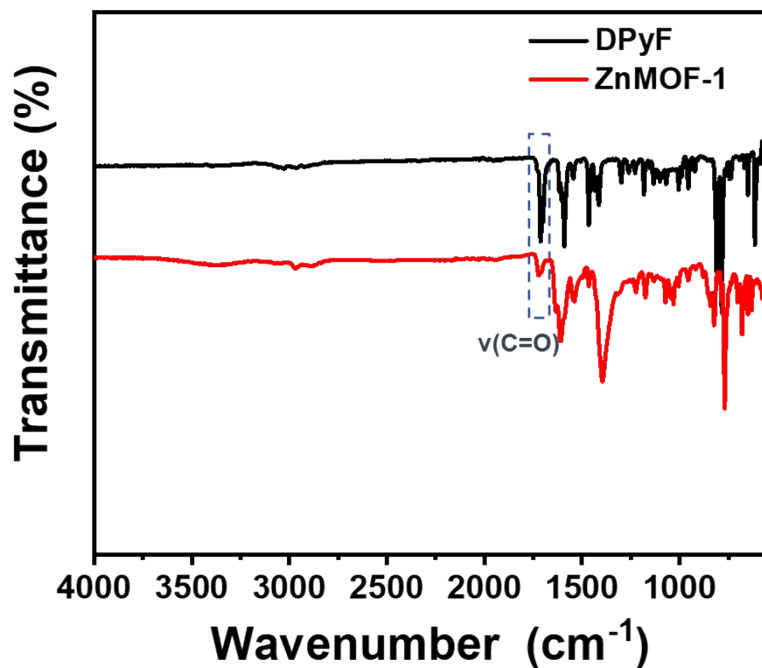

Figure S7. FTIR spectra of ZnMOF-1 and DPyF.

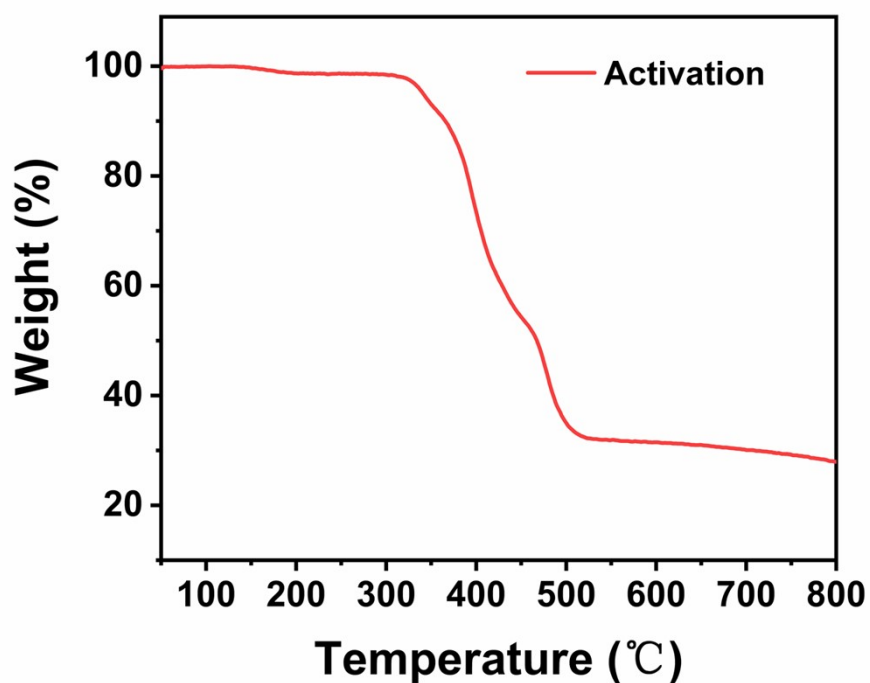

Figure S8. Thermogravimetric Analysis curve for activated ZnMOF-1.

## 5. Single crystal XRD data

**Table S1.** Crystal data and structure refinement for ZnMOF-1.

| Compound                          | ZnMOF-1                                                                       |                  |
|-----------------------------------|-------------------------------------------------------------------------------|------------------|
| Empirical formula                 | C <sub>51</sub> H <sub>30</sub> N <sub>2</sub> O <sub>9</sub> Zn <sub>2</sub> |                  |
| Formula weight                    | 945.51                                                                        |                  |
| Temperature                       | 296(2) K                                                                      |                  |
| Wavelength                        | 0.71073 Å                                                                     |                  |
| Crystal system                    | Triclinic                                                                     |                  |
| Space group                       | P1                                                                            |                  |
| Unit cell dimensions              | a = 15.147(3) Å                                                               | a = 106.792(6)°. |
|                                   | b = 15.168(3) Å                                                               | b = 103.569(6)°. |
|                                   | c = 22.006(5) Å                                                               | g = 101.715(6)°  |
| Volume                            | 4501.5(17) Å <sup>3</sup>                                                     |                  |
| Z                                 | 3                                                                             |                  |
| Density (calculated)              | 1.046 Mg/m <sup>3</sup>                                                       |                  |
| Absorption coefficient            | 0.844 mm <sup>-1</sup>                                                        |                  |
| F(000)                            | 1446                                                                          |                  |
| Crystal size                      | 0.220 x 0.180 x 0.160 mm <sup>3</sup>                                         |                  |
| Theta range for data collection   | 2.045 to 24.999°.                                                             |                  |
| Index ranges                      | -18<=h<=18, -18<=k<=18, -25<=l<=26                                            |                  |
| Reflections collected             | 51906                                                                         |                  |
| Independent reflections           | 28717 [R(int) = 0.0538]                                                       |                  |
| Completeness to theta = 24.999°   | 98.5 %                                                                        |                  |
| Absorption correction             | Semi-empirical from equivalents                                               |                  |
| Max. and min. transmission        | 0.7456 and 0.6043                                                             |                  |
| Refinement method                 | Full-matrix least-squares on F <sup>2</sup>                                   |                  |
| Data / restraints / parameters    | 28717 / 3003 / 1730                                                           |                  |
| Goodness-of-fit on F <sup>2</sup> | 1.045                                                                         |                  |
| Final R indices [I>2sigma(I)]     | R1 = 0.0575, wR2 = 0.1418                                                     |                  |
| R indices (all data)              | R1 = 0.0887, wR2 = 0.1577                                                     |                  |
| Absolute structure parameter      | 0.504(15)                                                                     |                  |
| Extinction coefficient            | n/a                                                                           |                  |
| Largest diff. peak and hole       | 0.995 and -0.597 e.Å <sup>-3</sup>                                            |                  |

## 6. Structural modelling of MOF

Table S2. Hydrogen bonds for ZnMOF-1 [ $\text{\AA}$  and  $^\circ$ ].

| D-H...A                  | d(D-H) | d(H...A) | d(D...A)  | $\angle(\text{DHA})$ |
|--------------------------|--------|----------|-----------|----------------------|
| C(48)-H (48)...O(7)#1    | 0.93   | 2.50     | 3.083(12) | 120.7                |
| C(83)-H (83)...O(9)#2    | 0.93   | 2.50     | 3.269(13) | 140.6                |
| C(99)-H (99)...O(10)     | 0.93   | 2.60     | 3.281(13) | 130.6                |
| C(100)-H (100)...O(16)#3 | 0.93   | 2.60     | 3.065(12) | 111.5                |
| C(134)-H (134)...O(19)   | 0.93   | 2.42     | 3.147(13) | 134.9                |

Symmetry transformations used to generate equivalent atoms:

#1  $x-1, y+1, z+1$  #2  $x, y, z-1$  #3  $x, y, z+1$

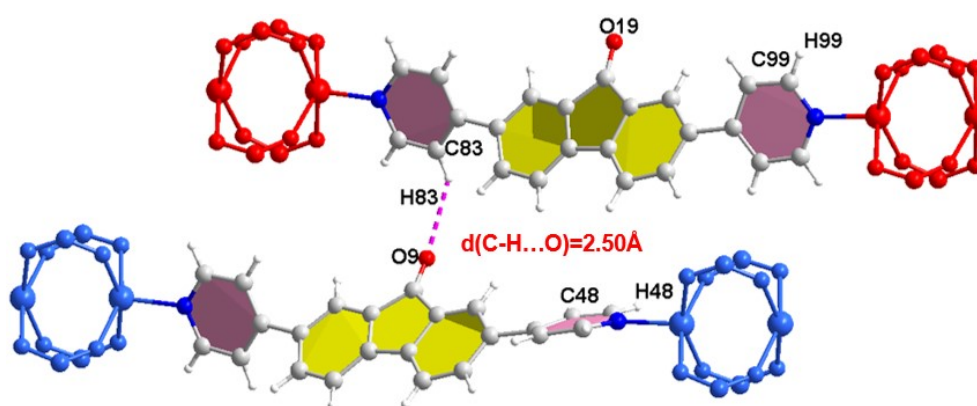

Figure S9. The hydrogen-bond linkages between the oxygen atom of the carbonyl functional group and the hydrogen atom of the of pyridine from the other frame.

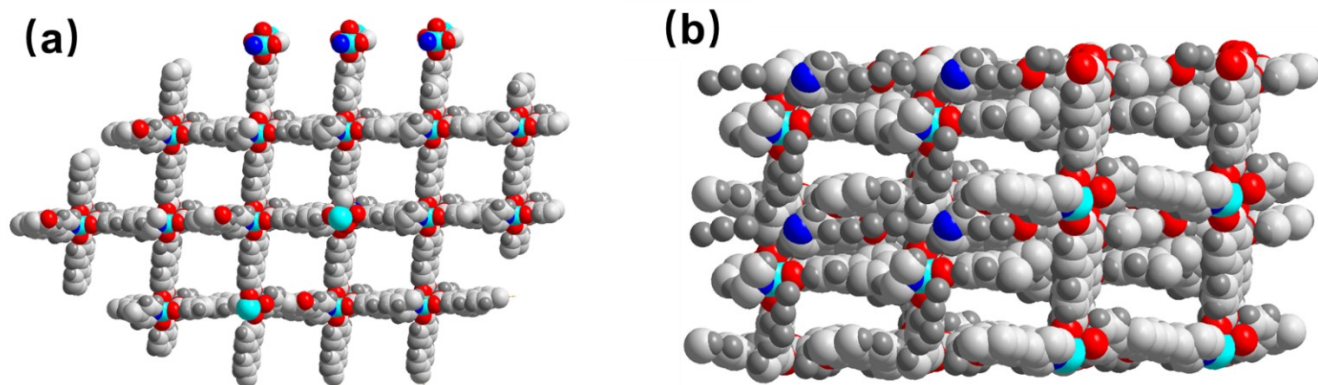

Figure S10. (a) Simplified framework structures of ZnMOF-1. (b) The structures were stacked in a three-fold interdigitated fashion to form three interpenetrating 3D frames.



## 7. Powder XRD and BET analysis

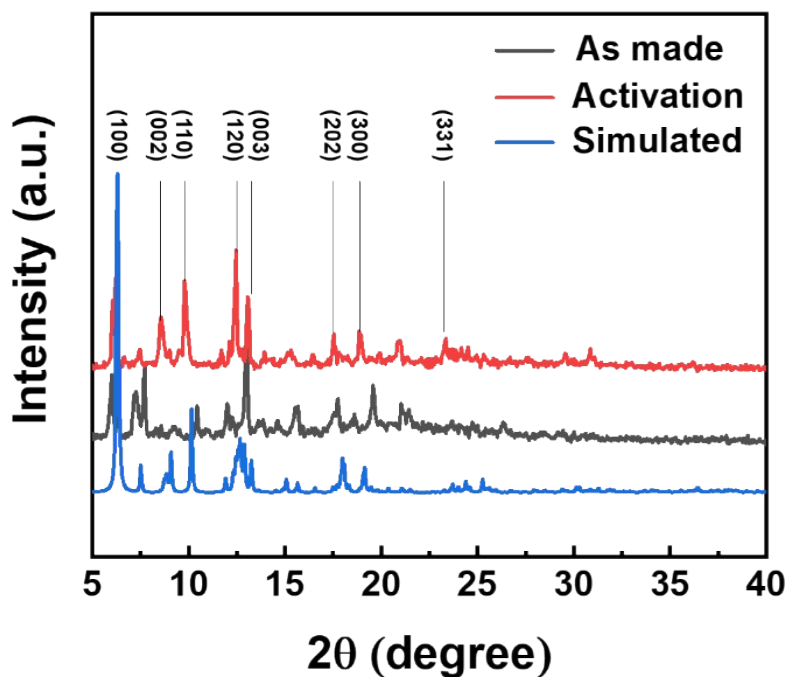

Figure S11. Powder X-ray diffraction (PXRD) patterns of simulated (blue), as-made (black), and activation (red) ZnMOF-1

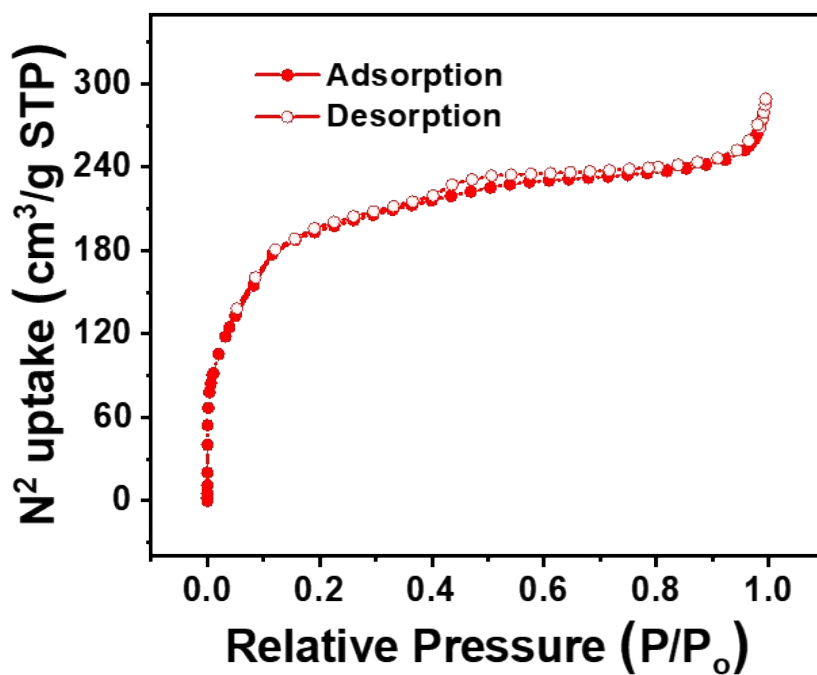

Figure S12. N<sub>2</sub> adsorption and desorption isotherms of degassed ZnMOF-1 at 77K.

## 8. PL studies

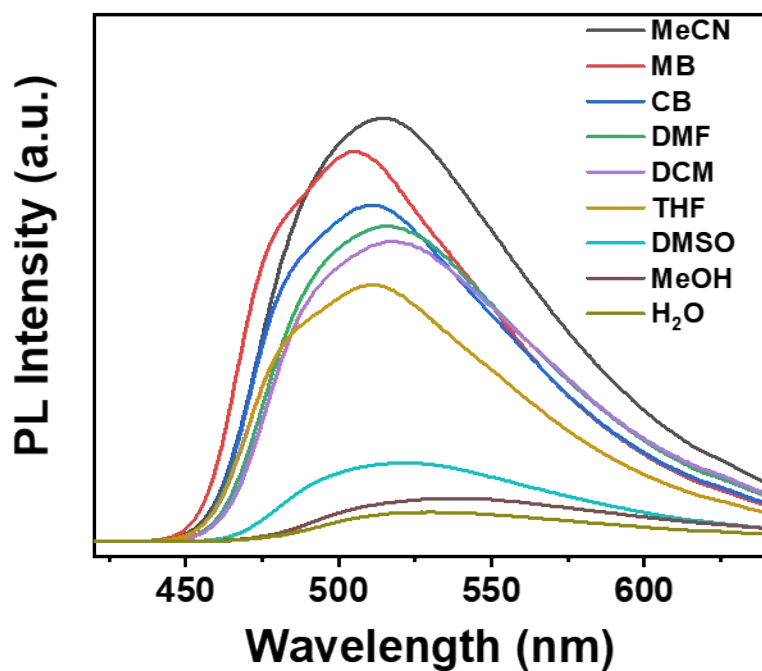

Figure S13. Fluorescence intensities of ZnMOF-1 in different solvents ( $\lambda_{\text{ex}} = 328$  nm).

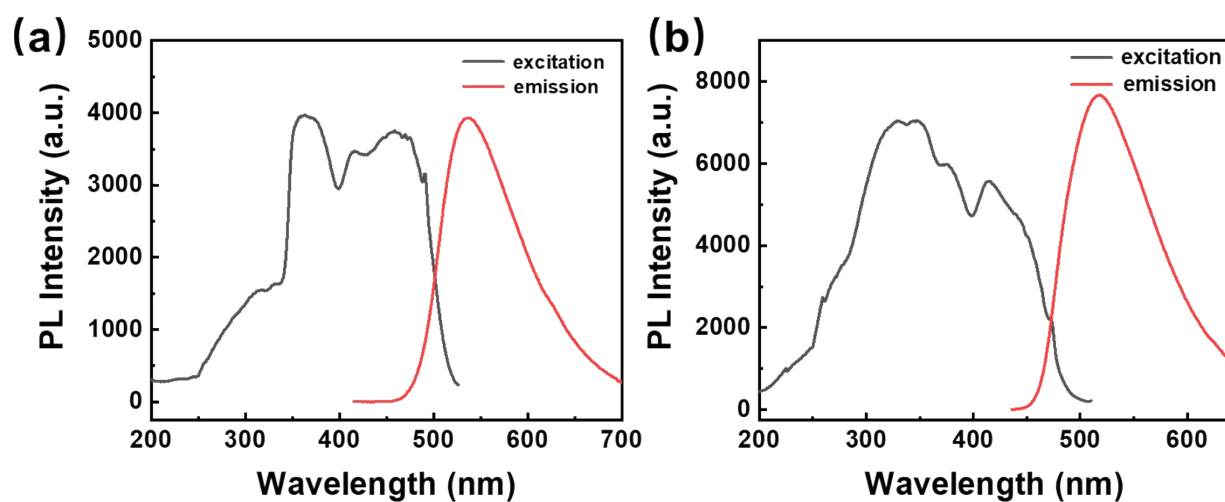

Figure S14. The excitation and emission spectra of (a) DPyF ligand and (b) ZnMOF-1 in MeCN solutions

## 9. Modelling of explosives

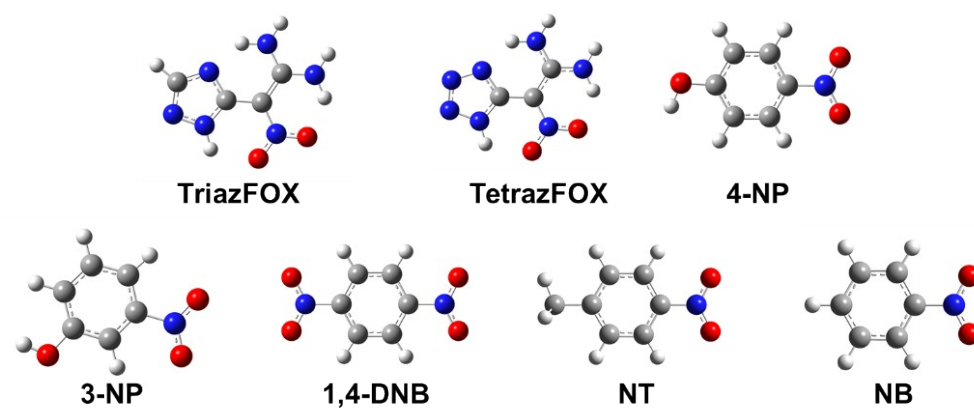

**Figure S15.** Molecular structures of the nitro-explosives.

**Table S3** Molecular sizes of nitro-explosives ( a, b, c are the length, width and height of the molecules )

| Dimension | TriazFOX | TetrazFOX | 4-NP  | 3-NP  | NT    | NB    | 1,4-DNB |
|-----------|----------|-----------|-------|-------|-------|-------|---------|
| a (Å)     | 9.372    | 8.948     | 9.251 | 9.131 | 9.466 | 8.611 | 9.856   |
| b (Å)     | 8.255    | 8.265     | 6.702 | 7.222 | 6.698 | 7.704 | 6.686   |
| c (Å)     | 2.758    | 2.752     | 3.040 | 2.722 | 4.162 | 3.040 | 3.040   |

## 10. Explosive detection with MOF

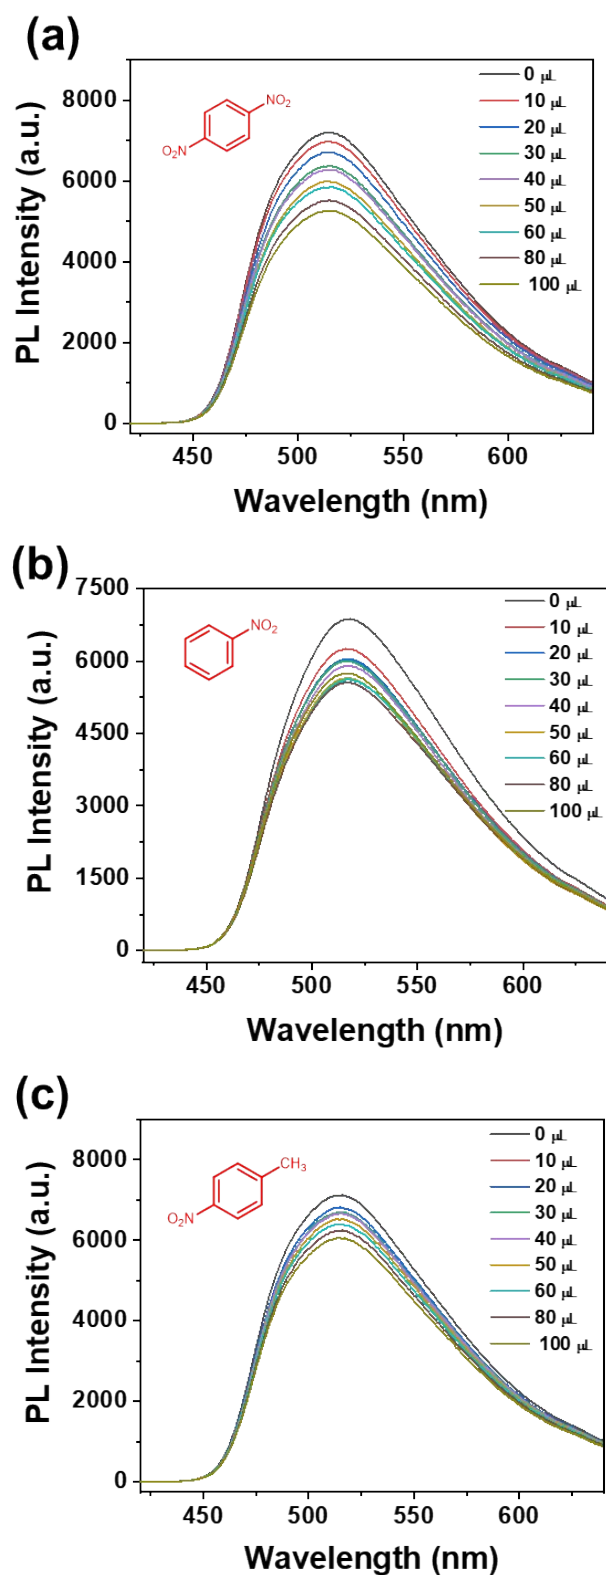

**Figure S16.** Quenching spectra for MOF solutions in MeCN with additions of 5 mM solutions of nitrobenzene compounds (a) 1,4-DNB, (b) NB and (c) NT.

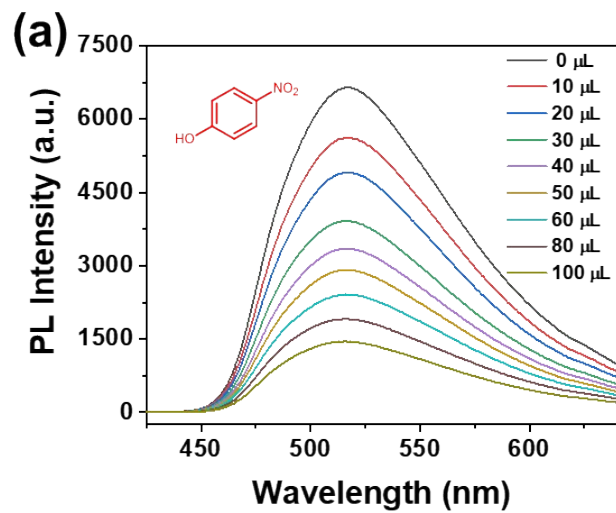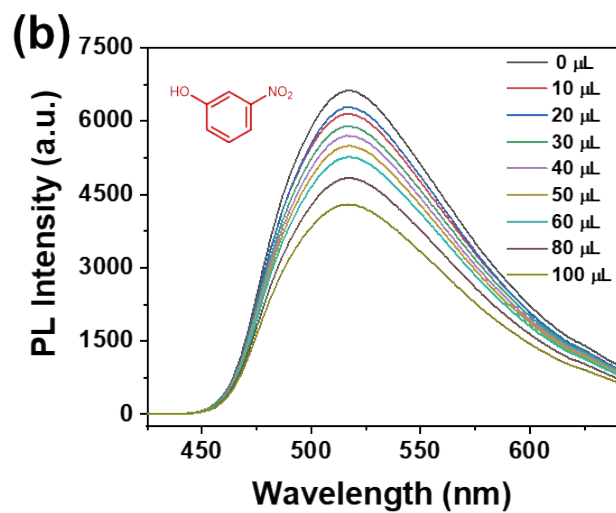

**Figure S17.** Quenching spectra for MOF solutions in MeCN with additions of 5 mM solutions of nitrophenol compounds (a) 4-NP and (b) 3-NP.

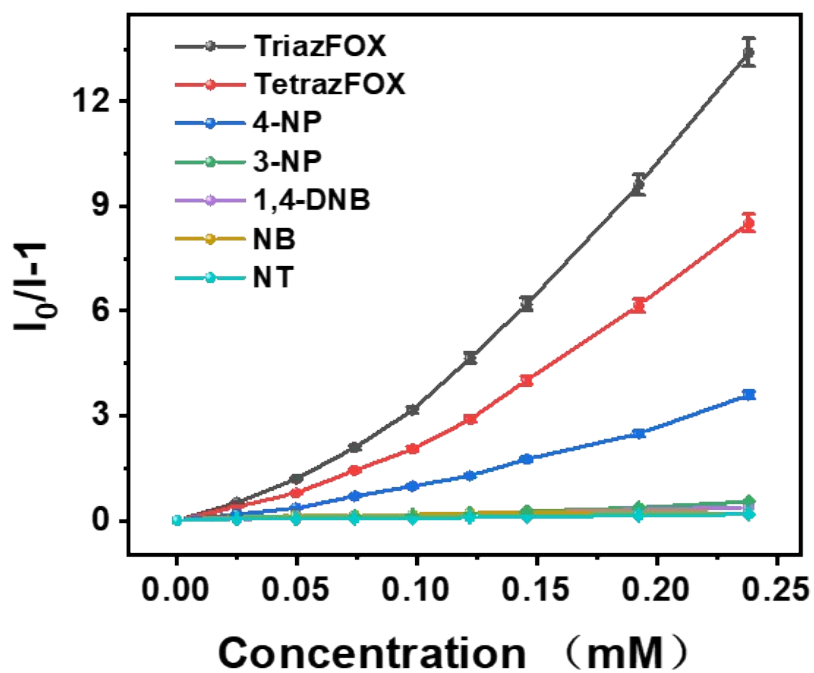

Figure S18. Stern-Volmer plot of MOF by gradual addition of different explosives in MeCN solutions

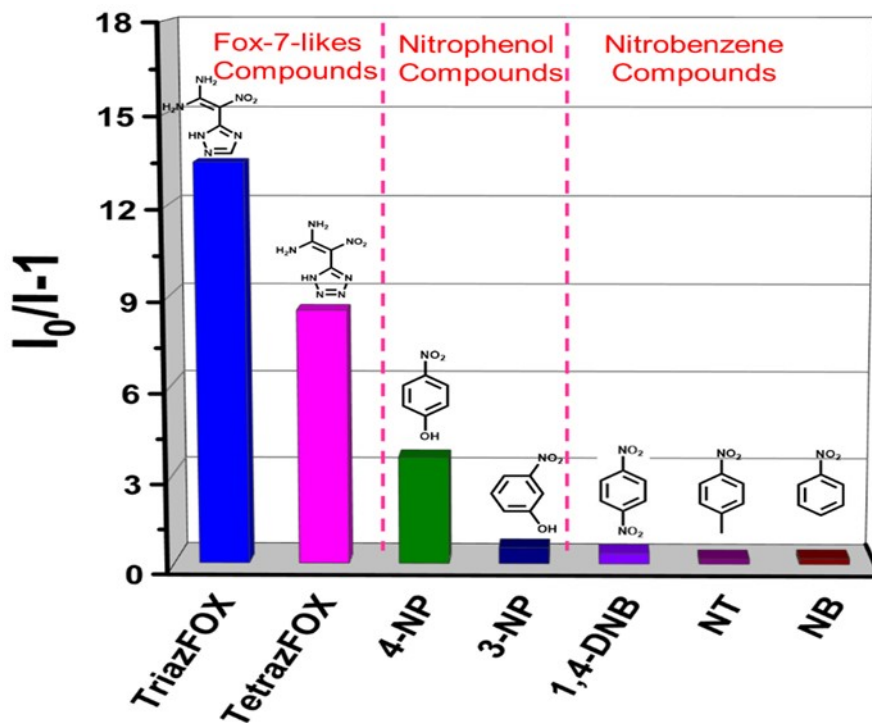

Figure S19. Quenching efficiency  $[(I_0/I-1) \times 100\%]$  obtained from different explosive for ZnMOF-1.

## 11. Modelling for the detection mechanism

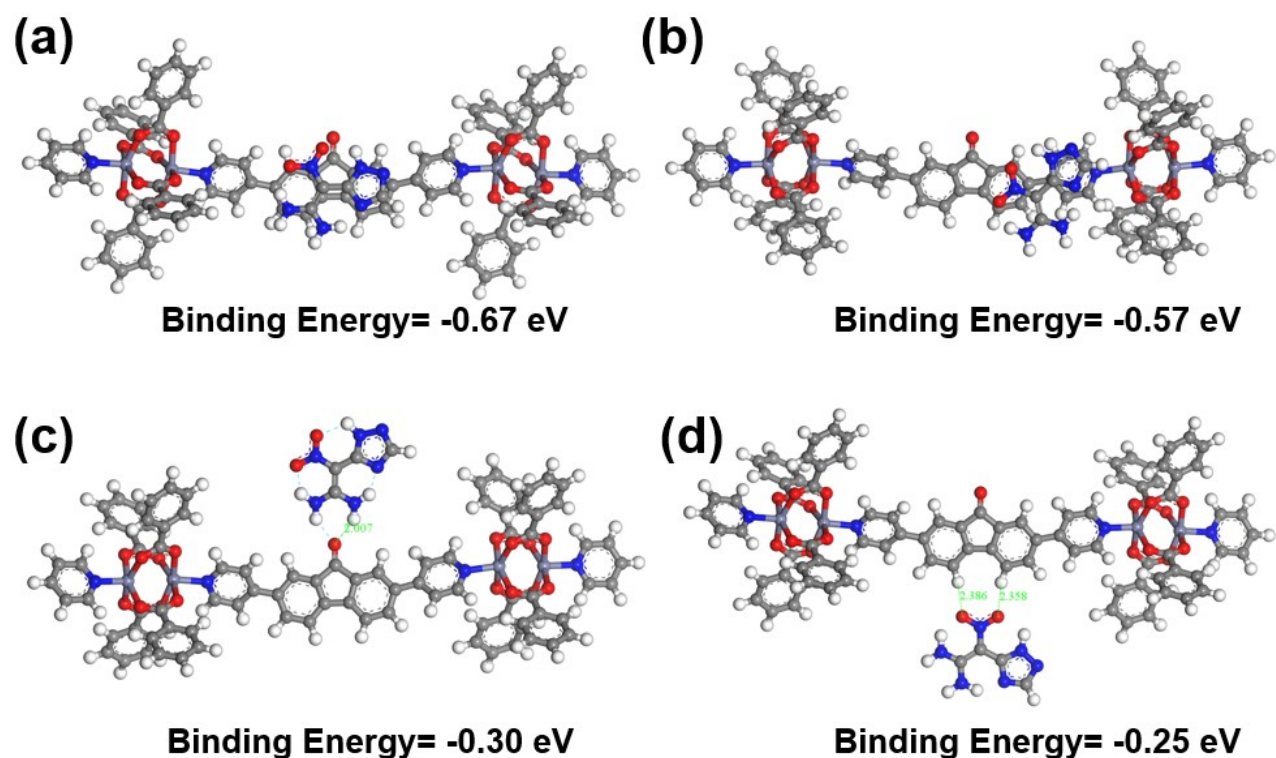

**Figure S20.** Four models constructed between TriazFOX and ZnMOF-1 on the basis of: (a)  $\pi$ - $\pi$  interaction within fluorenone core, (b)  $\pi$ - $\pi$  interaction surrounding pyridine end. (c) dipole-dipole interaction and hydrogen bonding interaction within fluorenone core. (d) dipole-dipole interaction within fluorenone core.

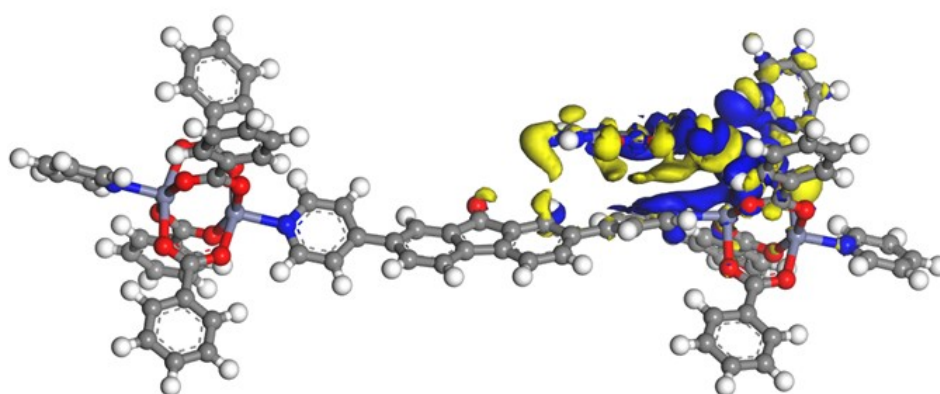

**Figure S21.** Change in charge densities after ZnMOF-1 interacts with TriazFOX.

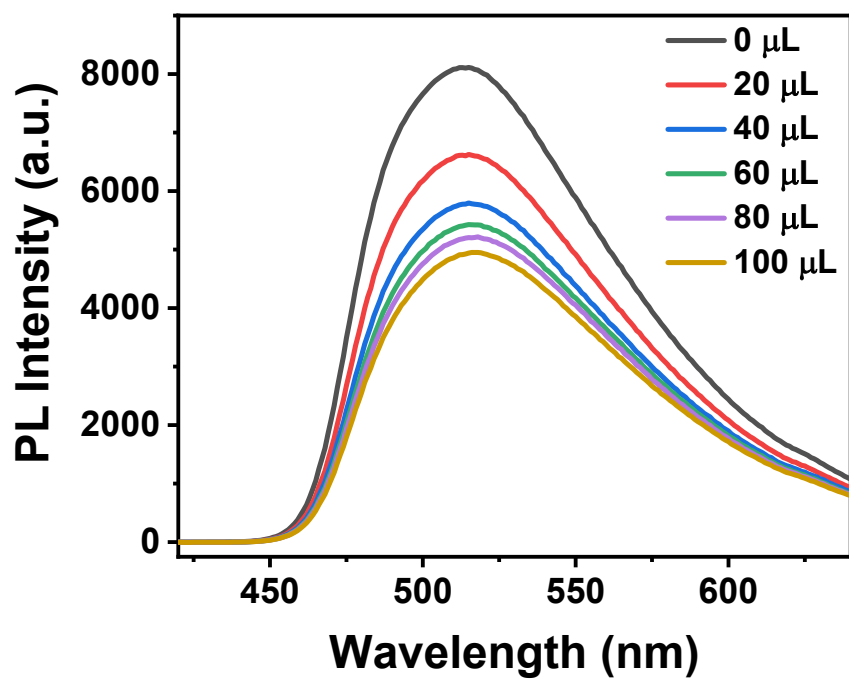

**Figure S22.** PL quenching spectra for 1 mg/ml ZnMOF-1 solutions in MeCN with additions of H<sub>2</sub>O (20 μL addition each time).
